# Supplementary material
Source: publisher figshare collection journal article supplement (https://frontiersin.figshare.com/ndownloader/files/31357276)

Flow Escalation: ROC for Lead Time 1 Hour and Time Window 2 Hours

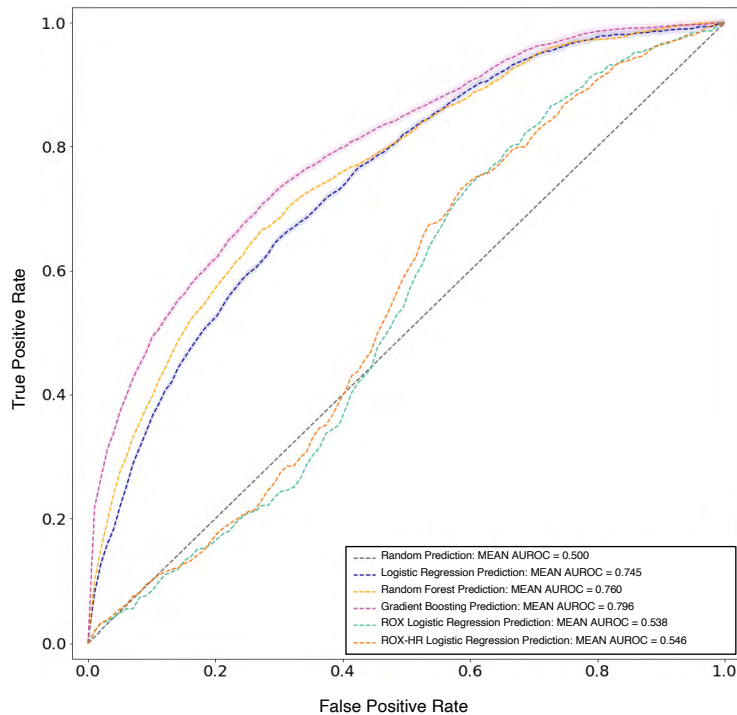

Flow Escalation: ROC for Lead Time 2 Hours and Time Window 2 Hours

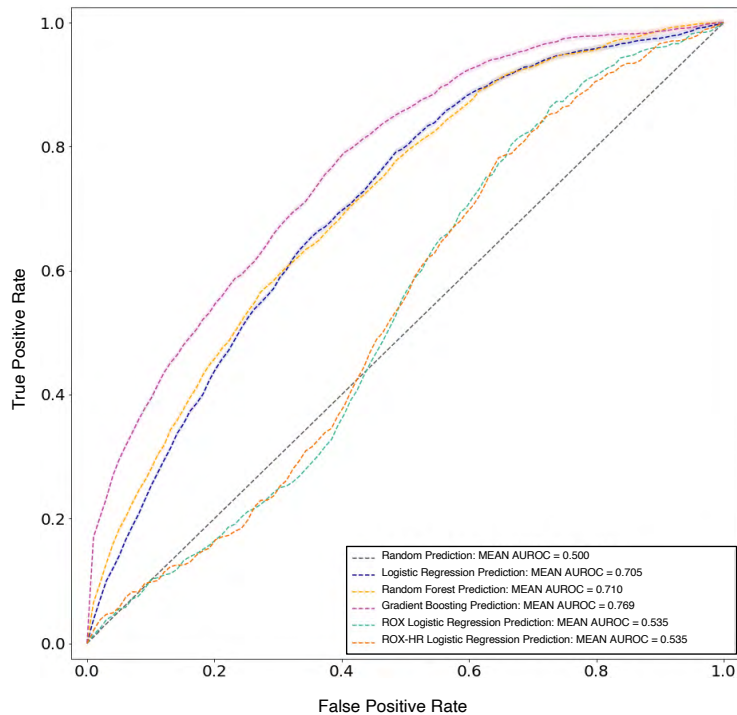

Flow Escalation: ROC for Lead Time 6 Hours and Time Window 2 Hours

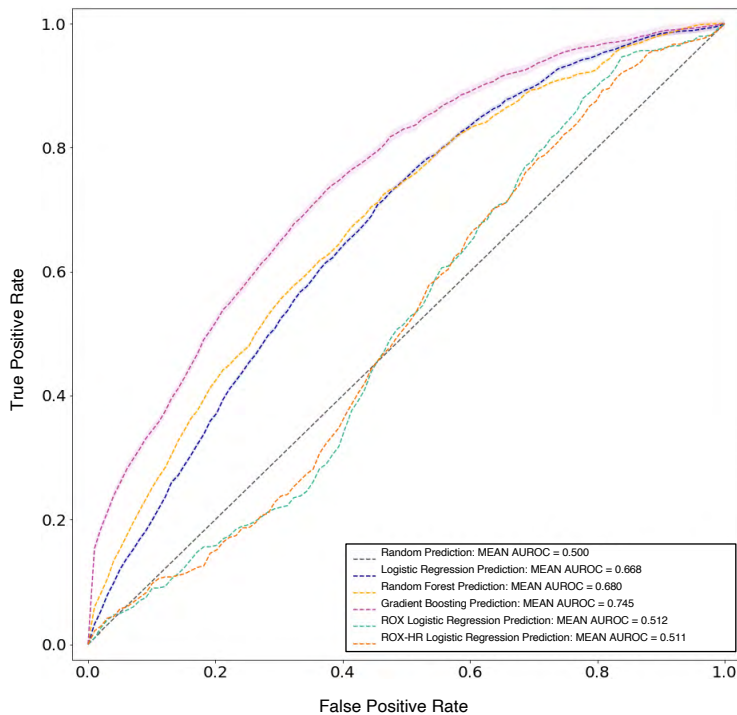

Flow Escalation: ROC for Lead Time 12 Hours and Time Window 2 Hours

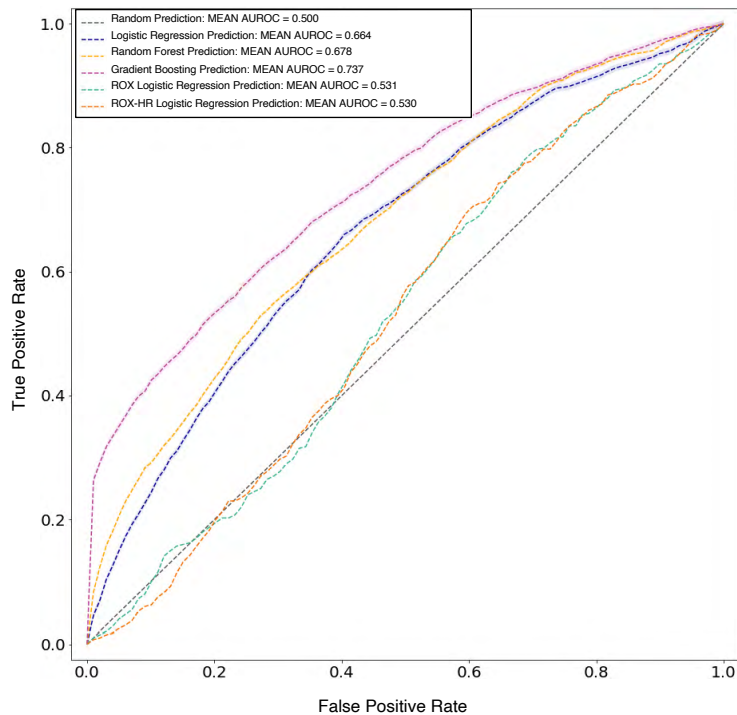

Supplement: Supplementary file [file 31357276]
